The neuropeptide SMYamide, a SIFamide paralog, is expressed by salivary gland innervating neurons in the American cockroach and likely functions as a hormone

5 Jan A. Veenstra<sup>1</sup>,

<sup>1</sup> INCIA UMR 5287 CNRS, Université de Bordeaux, Pessac, France.

10

Corresponding Author:

Jan A. Veenstra<sup>1</sup>

INCIA UMR 5287 CNRS, Université de Bordeaux, allée Geoffroy St Hillaire, CS 50023, 33 615

Pessac Cedex, France

15 Email address: [jan-adrianus.veenstra@u-bordeaux.fr](mailto:jan-adrianus.veenstra@u-bordeaux.fr)

## Abstract

20           The SMYamide genes are paralogs of the SIFamide genes and code for neuropeptides that are structurally similar to SIFamide. In the American cockroach, *Periplaneta americana*, the SMYamide gene is specifically expressed in the SN2 neurons that innervate the salivary glands and are known to produce action potentials during feeding. The innervation of the salivary glands by the SN2 neurons is such that one has to expect that on activation of these neurons significant amounts of SMYamide will  
25 be released into the hemolymph, thus suggesting that SMYamide also functions as a hormone. In the *Periplaneta* genome there are two putative SIFamide receptors and these are both expressed not only in the central nervous system and the salivary gland, but also in the gonads and other peripheral tissues. This reinforces the hypothesis that SMYamide also has an endocrine function in this species.

30  
Keywords: SIFamide, SMYamide, salivary gland, innervation, hormone, gonad

## 1. Introduction

SIFamide is an arthropod neuropeptide that was initially identified from a flesh fly by its ability  
35 to stimulate oviduct contractions in a locust. Antiserum raised to this neuropeptide showed it to be  
present in four large cells in the *pars intermedia*, a brain nucleus containing various types of  
neuroendocrine cells that project to the corpus cardiacum where hormones are released into the  
hemolymph. However, no SIFamide immunoreactivity was found in the corpus cardiacum (Janssen et  
al., 1996). We isolated and sequenced the peptide from the fruit fly *Drosophila melanogaster*. As in the  
40 fleshfly only four large cells in the brain were found to produce the peptide as shown by  
immunohistology, *in situ* hybridisation and transgene expression (Terhzaz et al., 2007). In the larva  
these neurons project a major axon to the ventral neuromeres, but during metamorphosis they develop  
extensive arborizations within the entire central nervous system. Nevertheless, there is no anatomical  
evidence that any such axons could release the peptide into the hemolymph.

45 Using transgenesis we expressed in the *Drosophila* SIFamide neurons either an apoptotic  
protein to kill them or RNAi to eliminate the peptide. Those experiments revealed that the four neurons  
and the peptide they produce are essential for the correct execution of male sexual behavior; in the  
absence of SIFamide males court males as intensely as females (Terhzaz et al., 2007). In *Drosophila*  
the fruitless gene produces male and female specific transcription factors that allow for the correct  
50 development of male and female brain architecture and subsequent sexual behavior. The effects of  
SIFamide on male sexual behavior is at least in part through neurons expressing fruitless (Sellami and  
Veenstra, 2015).

More recent studies have started to look at other species, such as the blood feeding bug  
*Rhodnius prolixus*, the locust *Schistocerca gregaria* as well as several cockroaches (Ayub et al., 2020;  
55 Gellerer et al., 2015; Arendt et al., 2016). In all these species orthologs of the four neuroendocrine cells  
in the *pars intermedia* are the major SIFamide immunoreactive neurons. In cockroaches and  
*Schistocerca* there are other additional SIFamide immunoreactive neurons, but only in the cockroach  
*Rhyparobia maderae* and *Rhodnius* have SIFamide immunoreactive projections been found in the  
corpora cardiaca (Ayub et al., 2020; Arendt et al., 2016), suggesting an endocrine function for  
60 SIFamide in those species.

The deorphanization of the G-protein coupled receptor (GPCR) encoded by *Drosophila* gene  
CG10823 as the SIFamide receptor (Jørgensen et al., 2006) allowed the identification of SIFamide

receptor orthologs from other species, such as one from the tick *Dermacentor variabilis* that is expressed in the male reproductive system (Sonenshine et al., 2011).

65           These initial data might suggest an important and perhaps preponderant role in reproduction and sexual behavior, but SIFamide and its receptor have now been shown to be important for the correct execution of other behaviors as well, such as sleep in *Drosophila* and aggression in a decapod crustacean (Park et al., 2014; Martelli et al., 2017; Dreyer et al., 2019; Vázquez-Acevedo et al. 2009), while in the tick *Ixodes scapularis* SIFamide innervates the salivary gland and in *Rhodnius* it is  
70 released during feeding and increases meal size as well as the rate of heart beat (Šimo et al., 2009; Ayub et al., 2020).

          In some insect species the SIFamide gene has a paralog. IMFamide is a SIFamide paralog that was initially described from the silkworm *Bombyx mori* (Roller et al., 2008), but seems to be generally present in Lepidoptera. An independent SIFamide gene duplication occurred in the termite  
75 *Zootermopsis nevadensis* and the locust *Locusta migratoria* where the paralog peptide is SMYamide (Veenstra, 2014). Whereas the primary sequence of IMFamide shows significant differences from SIFamide, SIFamide and SMYamide peptides have remarkably similar structures. The recently published genome sequence for the American cockroach *Periplaneta americana* (Li et al., 2018) similarly reveals both a SIFamide and a SMYamide gene. I here report that in the latter species  
80 SMYamide is specifically expressed in two neurons innervating the salivary glands and that it seems likely that SMYamide also has a hormonal function.

## 2. Materials and Methods

### 85 2.1 Animals

*Periplaneta americana* are from a small colony that I maintain on mouse chow and water and that was initially established from animals obtained from Professor Peter Kloppenburg (University of Cologne, Germany). Only adults were used here.

### 90 2.2 RNA extraction and cDNA synthesis

Total RNA was isolated from specific tissues using a kit from Macherey-Nagel (Hoerdt, France). Moloney murine leukemia virus reverse transcriptase (New England Biolabs, Evry, France) and random hexamer primers were used to transcribe 1 µg RNA in a 20 µl reaction into cDNA.

### 95 2.3 RT-PCR for receptor expression

One microliter of cDNA was amplified by PCR using OneTaq DNA Polymerase (New England Biolabs) with the following primers for the two putative SIFamide receptor: SIFaR1-forward 5'-CAGTCTCATTGCAGTCTCGC-3', SIFaR1-reverse 5'-GCATCTTGACCACCTTGACC-3', SIFaR2-forward 5'-CAACCTCTTCATCGCCAACC-3', SIFaR2-reverse 5'-GCGGGAACAGATAGCACATG-  
100 3', while actin, as a control, was amplified with primers actin-forward 5'-GCTATCCAGGCTGTGCTTTC-3' and actin-reverse 5'-CAGGAAGGAAGGTTGGAACA-3'. All three primer pairs span an intron in the *Periplaneta* genome and yield products of around 400 bp. PCR profiles consisted of 30 sec denaturation at 94 °C, followed by 32 cycles of 15 sec at 94 °C, 15 sec at the annealing temperature and 30 sec at 68 °C. This was followed by final extension at 68 °C for three  
105 minutes. Annealing temperatures were 54 °C for the putative SIFamide receptors and 52 °C for actin. Bands were cut from the gel, purified and their identity confirmed by sequencing.

### 2.4 Immunohistology

Tissues were fixed in phosphate buffered 4% paraformaldehyde in Eppendorf tubes for 2 to 4  
110 hrs at room temperature. After eight 30 minute washes in PBS containing 0.1% sodium azide and 1% Triton X100 (PBSAT), tissues were incubated for 1 hr in 10% normal goat serum (NGS) in PBSAT. Primary antisera diluted in 10% NGS in PBSAT were then added and tissues were incubated at room temperature for three days. Eight 30 minute washes with PBSAT and a 1 hour preincubation in 10% NGS in PBSAT preceded a two day incubation in secondary antiserum. This was followed by eight 30  
115 minute washes in PBSAT after which tissues were transferred to small dissection dishes [to facilitate exchanging the glycerol solutions]. The procedure was continued with four 15 min changes in increasing concentrations of glycerol (20 %, 40 %, 60 % and 80 %) and finally tissues were mounted between a slide and coverslip in 80 % glycerol. All incubations at room temperature were performed on a gently rotating orbital shaker.

120 Two rabbit antisera were used, an old commercial antiserum to 5-hydroxytryptamine (5HT) from Immunotech (Marseille, France) and my own against SIFamide (Terhzaz et al., 2007). IgG from the SIFamide antiserum was isolated using caprylic acid and then coupled to tetramethyl-rhodamine to allow demonstration of both 5HT- and SIFamide-immunoreactivity in the same preparation. For such double labelings (Fig. 3), tissue was first incubated in the 5HT antiserum, followed by an fluorescein

125 labeled Fab fragment of goat anti-rabbit IgG. The tissue was subsequently incubated in the rhodamin  
labeled SIFamide IgG for another two to three days. Primary antisera were diluted 1:4,000 (SIFamide)  
or 1:400 (5HT), the rhodamine labeled SIFamide antiserum was diluted 1:400. Secondary antisera were  
Alexa488-labeled goat anti-rabbit IgG and FITC-labeled Fab fragment from goat-anti rabbit IgG  
(Jackson ImmunoResearch Europe Ltd, Ely, UK).

130

### 2.5 *In situ hybridization probes*

cDNA from brain-subesophageal complexes was used to amplify partial coding sequences for  
the SIFamide and SMYamide *Periplaneta* genes with Q5 polymerase (New England Biolabs), with the  
following primers: SIFa-forward 5'-TGTTGCCACATGTCTGCTTC-3', SIFa-reverse 5'-  
135 GAAACCACGCTGAGCAGG-3', SMYa-forward 5'-ATGAAATTCGCCTGCACCG-3' and SMYa-  
reverse 5'-GCAGACCTCTACAGCCATCT-3'. PCR products were gel-purified and quantitated and  
then used to make digoxigenin-labeled anti-sense probes using single primer PCR with Taq polymerase  
(New England Biolabs) in which a third of the dTTP had been replaced with Digoxigenin-X-(5-  
aminoallyl)-2'-deoxyuridine-5'-triphosphate (Jena Bioscience, Jena, Germany) for 40 cycles. The final  
140 PCR product was used without purification and diluted ten times with HS for *in situ* hybridization  
experiments.

### 2.6 *Combined in situ hybridization and immunohistology*

The *in situ* hybridization protocol is based on a protocol for *Drosophila* (Kim et al., 2006) and  
145 was modified in order to take into account the much larger size of the cockroach CNS. Dissections  
were done in 0.9 % NaCl and tissues were fixed in phosphate buffered 4% paraformaldehyde for 2 to 4  
hrs at room temperature in Eppendorf tubes. Tissues were subsequently washed thrice for 30 min in PBS  
with 0.2 % Tween 20 (PBST) and once for 30 min in 70% ethanol. The 70% ethanol was then changed  
and the tissues stored at -20 °C usually for three days, but sometimes longer. Tissues were next washed  
150 thrice for 30 min in PBST and then incubated with Proteinase K (25 µg/ml) in PBST for 45 min. The  
proteinase K was stopped by washing the tissue for 30 min in glycine (2 mg/ml) in PBST and this was  
followed by two washes of 30 min in PBST. The tissues were then fixed a second time in phosphate  
buffered 4% paraformaldehyde for 1 hr followed by two washes in PBST for 30 min and one for 30  
min in 1:1 mixture of hybridization solution (HS: 50 µg/ml heparin, 100 µg/ml salmon testes DNA,  
155 750 mM NaCl, 75 mM sodium citrate, in deionized RNase free water, pH 7.0, 50% deionized

formamide, 0.1 % Tween 20) and PBST. Next the solution was replaced with HS and incubated for 30 min in HS. Up to this point everything is done at room temperature. HS is then replaced with fresh HS and the tissues are put in a water bath at 48 °C. Two hours later HS is replaced with HS containing up to 10% of digoxigenin hybridization probe which has previously been brought to 95 °C for either 3  
160 min, in case of a previously used probe, or 45 min when a hybridization probe is used for the first time. Hybridization is carried out overnight at 48 °C. The following day hybridization probe is recovered and stored at -20 °C for future use. Tissues are washed in fresh HS five times, first three times for 2.5 to 4 hrs, then once overnight, and a final wash for 3 to 4 hrs; all washes are at 48 °C. The tissues are then removed from the water bath and the remainder of the procedure is performed at room temperature.  
165 The HS is replaced with the 1:1 mixture of hybridization solution for 30 minutes, followed by three washes in PBST for 30 min each after which the tissues are saturated with 1% BSA in PBST for 1 hr. Next the 1% BSA in PBST is replaced with the same solution to which both sheep anti-digoxigenin Fab-fragments conjugated to alkaline phosphatase (Roche Diagnostics GmbH, Mannheim, Germany) in a 1:1,000 dilution and SIFamide antiserum in a 1:2,000 dilution have been added. Incubation is  
170 overnight at room temperature. Next morning tissues are washed twice 30 min with PBST, followed by three washes in freshly prepared alkaline phosphate buffer (APB, 100 mM Tris, 50 mM MgCl<sub>2</sub>, 100 mM NaCl, pH 9.5 and 0.1% Tween 20). During the last wash, the tissues are transferred to small glass dissection dishes and after the last wash, the digoxigenin probe is visualized by replacing the APB is replaced with the same containing 20 µl/ml of a commercial NBT/BCIP stock solution (Roche  
175 Diagnostics GmbH, Mannheim, Germany, 18.75 mg/ml nitro blue tetrazolium chloride and 9.4 mg/ml 5-bromo-4-chloro-3-indolyl-phosphate, toluidine-salt in 67% DMSO). Color development is followed under a binocular and may take 5 to 15 minutes and once it is judged satisfactory, the alkaline phosphatase is stopped by changing the staining solution with 100 mM phosphate buffer, pH 7.0. Note that from now on no detergent can be used, as it may dissolve the product from the alkaline  
180 phosphatase reaction. After two washes of 5 minutes with the 100 mM phosphate buffer, tissues are transferred to an Eppendorf tube, followed by five 30 min washes in PBS containing 0.1% sodium azide (PBSA). Tissues are then incubated in 10% normal goat serum in PBSA, followed by incubation over night with secondary antiserum diluted 1:1000 in 10 % normal goat serum in PBSA at room temperature. The next day, the tissues are washed eight times for 30 min in PBSA and then transferred  
185 to small dissection dishes in which they are exposed to increasing concentrations of glycerol (20 %, 40 %, 60 % and 80 %, 15 minutes each) and then tissues are mounted in 80 % glycerol.

## 2.7 Bioinformatics

Methods employed in bioinformatics have been described in detail in a previous manuscript  
190 (Veenstra, 2020). For the expression of SIFamide, SMYamide and their putative receptors in  
*Periplaneta* the following transcriptome short read archives (SRAs) were analyzed: DRR014884,  
DRR014885, DRR014886, DRR014887, DRR014888, DRR014889, SRR921630, SRR5286150,  
SRR5286151, SRR5286152, SRR5286153, SRR5286154, SRR1184457, SRR1184458, SRR1322009,  
SRR2994649, SRR2994650, SRR3056857, SRR3056858, SRR3089536, SRR3089537, SRR3089538,  
195 SRR3289663, SRR3289684, SRR3289687, SRR5097509, SRR5097510, SRR5097511, SRR5097512,  
SRR5097513, SRR5097514, SRR5097515 and SRR5097516. These were downloaded from NCBI:  
<https://www.ncbi.nlm.nih.gov/sra>.

Coding sequences for SIFamide and SMYamide precursors as well as those for putative  
SIFamide receptors were deduced from transcriptome and genome data as described (Veenstra, 2020).  
200 All these sequences are listed in the supplementary spreadsheet. Sequence logos for the neuropeptides  
were made from these peptide using <https://weblogo.berkeley.edu/>. A phylogenetic tree from the  
SIFamide GPCRs was made by using clustal omega (Sievers et al., 2011) to align the sequences and  
Fasttree2 (Price et al., 2010) to produce a tree from of the alignment of their transmembrane regions.

## 205 3. Results

### 3.1 SMYamide distribution and sequences

SMYamide precursors were found in several Polyneoptera insect orders. The SIFamide gene  
duplication seems to have occurred after the Plecoptera diverged, since SMYamide genes have been  
210 found in Orthoptera, Embioptera, Phasmatodea, Mantodea and Blattodea, but could not be found in  
genomes from Plecoptera or Polyneopteran insect orders that evolved even earlier. Analysis of  
Polyneopteran transcriptome yielded similar results (Bläser and Predel, 2020). The structure of the  
various SMYamide peptides is not as well conserved as that from the SIFamides (Figs. 1, S1, S2).

### 215 3.2 SIFamide-immunoreactivity in *Periplaneta*

SIFamide immunoreactivity in the brain of *Periplaneta americana* has been previously  
described in detail and six different SIFamide immunoreactive cell groups were identified (Arendt et



al., 2016). Although I used whole mounts rather than sections which may make it more difficult to identify neurons, the same cells were found here, although group 6 was not always identified. These  
220 cells have all been previously described and so there is no need to that here. In the ventral nerve cord all ganglia show extensive SIFamide immunoreactive arborizations of the four large interneurons in the brain as also described for the locust *Schistocerca gregaria* (Gellerer et al., 2015). When SIFamide immunoreactive neurons were encountered in thoracic or abdominal ganglia there were not symmetrical, their axons could only be followed for a short distance into the neuropile and they seemed  
225 to be local interneurons (Fig. 2c). As in *Schistocerca* (Gellerer et al., 2015) no SIFamide immunoreactive material was detected in any of the efferent nerves from these ganglia.

However, two prominent SIFamide immunoreactive neurons were found in the subesophageal ganglion (Fig. 3). Their axons leave the ganglion through the salivary duct nerve (SDN) that is known to contain two large axons from the contralateral salivary neuron 1 (SN1), the ipsilateral salivary  
230 neuron 2 (SN2) as well as a few smaller 5HT-immunoreactive neurons. SIFamide and 5HT immunoreactivities do not colocalize (Figs 3b,c). Both the position within the ganglion and the ipsilateral projections confirm that the SIFamide immunoreactive neurons are the SN2's. The innervation of salivary glands by the SIFamide immunoreactive axons appears superficial, as the axons seem to surround the salivary acini, rather than making close contact with them like the 5HT axons that  
235 terminate between the lateral membranes of individual cells of the acini (Fig. 3b) and that also reach the gland through the SDN.

As previously suggested by others (Baumann et al., 2004) these observations suggest that the axon terminations of the SN2's within the salivary glands represent neurohemal release sites. It can thus be expected that significant quantities of peptide will be released into the hemolymph when these  
240 neurons are active and that the peptide acts as a hormone on other target tissues as well as on the salivary gland. Thus one question of interest concerns whether receptors might be expressed in other tissues. As the cockroach has two SIFamide-like genes, there is also the question which of the two peptides is produced by the SN2 neurons.

### 245 3.3 In situ hybridization

Coding sequences for SIFamide and SMYamide are very short and this limits the choice of suitable primers for PCR amplification. Consequently, the hybridization probes are also short and the signals are not very strong. Nevertheless, *in situ* hybridization yielded positive signals for the SIFamide

antisense probe in the large SIFamide interneurons in the brain as well as in some neurons of cell  
250 groups 2 and 3. In the subesophageal ganglion no reliable SIFamide hybridization signals were found,  
but the two SN2 neurons yielded a positive signal for SMYamide (Fig. 4).

These results are consistent with transcriptome analyses from brain and subesophageal ganglia  
in this species where 13,852 SIFamide and 34 SMYamide specific reads were found in brain SRAs  
versus 1,122 SIFamide and 44,733 SMYamide specific reads in SRAs from the subesophageal ganglion  
255 (for details see Table S1).

### 3.4 SIFamide receptors

As in the termite *Zootermopsis* (Veenstra, 2014) the *Periplaneta* genome contains two genes  
coding for a SIFamide-like receptor. There are three possible explanation for the existence of two such  
260 receptors in these species. First, these species have both a SIFamide and a SMYamide gene and it is  
plausible that the two neuropeptides each have their own specific receptor. Secondly, the second  
putative SIFamide receptor could have another as yet unknown ligand and lastly, both receptors might  
be activated by SIFamide and SMYamide.

A comparative sequence analysis of arthropod SIFamide receptors yields a phylogenetic tree  
265 that reveals two major branches (Fig. 5). One branch contains the deorphanized *Drosophila* and  
*Bombus terrestris* SIFamide receptors (Jørgensen et al, 2006; Lismont et al., 2018), the other the  
deorphanized *Ixodes-2* SIFamide receptor (Šimo et al., 2013). Furthermore, in the planthopper  
*Nilaparvata lugens* no SMYamide gene can be found, but it does have two SIFamide receptors (Tanaka  
et al., 2014). It thus appears likely that all these GPCRs are indeed activated by both SIFamide and  
270 SMYamide. The position of the deorphanized *Drosophila* SIFamide receptor on the phylogenetic tree is  
unusual and a close inspection of the various arthropod SIFamide receptor sequences shows the  
sequence from *Drosophila* to differ significantly from the others (Fig. S3).

### 3.5 SIFamide receptor expression in *Periplaneta*

275 PCR on cDNA from a variety of tissues show that both putative SIFamide receptors are  
expressed not only in the central nervous system and the salivary glands, but also in the testis and ovary  
and a low level expression seems to be present in the midgut, Malpighian tubules, fat body and flight  
muscle (Fig. 6). Sequence analysis of the purified PCR products confirmed unambiguously the  
identities of the PCR products (Figs. S4 and S5).

280 The number of transcriptome SRAs from *Periplaneta* is relatively small and covers only some  
of the tissues. Nevertheless it is interesting to note that testes SRAs confirm the presence of SIFamide  
receptor 1 specific reads while the abundance of SIFamide receptor reads in whole body extracts from  
females can not explained by their expression in the central nervous system and thus indirectly suggests  
expression of these receptors in peripheral tissues (Table S1).

285

#### 4. Discussion

This study reveals that two previously identified neurons in the subesophageal ganglion that  
innervate the salivary gland are immunoreactive with antiserum to SIFamide. *In situ* hybridization  
290 experiment show that these neurons express the SMYamide rather than the SIFamide gene. Publicly  
available expression data from the brain and subesophageal ganglion support this conclusion. Results  
also show that the SIFamide receptor is expressed in tissues other than the brain and the salivary  
glands.

It is not surprising that the SIFamide antiserum recognizes SMYamide, as the two peptides  
295 show significant sequence similarity with C-termini that are almost identical (Fig. 1). Isoleucine-  
methionine and phenylalanine-tyrosine are both common amino substitutions in neuropeptide evolution  
and the remainder of the sequences are also similar. In *Nauphoeta cinerea*, a different cockroach  
species, the SN2 neurons were shown to contain the large electron dense granules that typically contain  
neuropeptides (Maxwell, 1978). Indeed it had been previously speculated that these neurons also  
300 produce a neuropeptide in *Periplaneta americana* (Baumann et al, 2004). An earlier paper showed the  
SN2 neurons be immunoreactive with GABA antisera and this is thus a likely case of co-localisation of  
a classical neurotransmitter with a neuropeptide (Rotte et al., 2009).

The SN2 neurons in the cockroach have been well characterized. Electrophysiological  
recordings from this nerve during feeding show two large action potentials, with the largest one derived  
305 from the dopaminergic salivary neuron 1 and the smaller of the two from SN2, as well as a number of  
much smaller action potentials believed to derive from the 5HT-immunoreactive axons (Watanabe and  
Mizunami, 2006). In the cockroach the cell bodies from which these 5HT axons originate are unknown,  
but similar neurons in locusts have been called satellite neurons and are located in the subesophageal  
ganglion (Schachtner and Bräunig, 1995) and it seems plausible that these are homologs of the SEN  
310 neurons in *Periplaneta* (Davis, 1987).

Dopamine is known to stimulate fluid secretion but does not seem to stimulate release of protein, while 5HT stimulates secretion of both fluid and a variety of proteins (Just and Walz, 1996), which one assumes represent digestive enzymes. The effects of SMYamide on the salivary gland remain to be determined. GABA, which is co-localized with SMYamide in SN2, alone has no effect on  
315 either fluid secretion or electrical activity of the salivary gland neurons, but it reinforces both these parameters when the salivary duct nerve is electrically stimulated (Rotte et al., 2009). Since such stimulation must also lead to release of SMYamide one has to assume that SMYamide stimulates salivation, even though it is unknown whether this concerns the secretion of fluid, digestive enzymes, or both.

320 The SMYamide gene has its origin in a duplication of the SIFamide gene. There are different reasons as to why duplicated neuropeptide may not be not selected against and thus survive during evolution. The need for a high quantities of gene products is one of them. This is likely the case for the amplified vasopressin-like genes in *Locusta migratoria*, where an initially peptidergic interneuron evolved into a neuroendocrine cell and therefore almost certainly needs to be able to produce much  
325 larger quantities of peptides. One might be tempted at first sight to think that the very large SIFamide interneurons in the brain might similarly benefit from a second gene producing a very similar peptide. However the absence of significant expression of SMYamide in the brain suggests that this is not the case. Another scenario is the specialization of the different genes for different functions, the expression of SIFamide in the brain interneurons and SMYamide by the neurons in the subesophageal ganglion  
330 shows that this could be the case here.

Based on the pattern of innervation of salivary glands by the SN2 neurons it has previously been suggested that these neurons are neuroendocrine in nature (Baumann et al., 2004). The expression patterns of the two *Periplaneta* SIFamide receptors reinforces the notion that SMYamide is indeed a hormone. The first SIFamide was identified using contractions of the locust oviduct as a bioassay  
335 (Janssen et al., 1996), but work on flies failed to find any evidence for the possible release of this peptide into the hemolymph. It was neither possible to find SIFamide innervation of the oviduct or any other potential target tissue. Although the *Drosophila* SIFamide receptor is expressed outside the nervous system, it is in afferent neurons that have axons projecting into the nervous system where they are exposed to SIFamide (Sellami and Veenstra, 2015). The data presented here show significant  
340 expression of both SIFamide receptors in peripheral tissues, particularly the gonads. In the bumblebee the SIFamide receptor is also expressed in the testes as well as other peripheral tissues (Elsmont et al.,

2018). This suggests that perhaps these peptides, *i.e.* SIFamide, SMYamide and/or IMFamide, may function as endocrines in other species as well, including holometabolous insect species. The phylogenetic tree of the SIFamide receptor is intriguing in this respect. The *Drosophila* receptor looks like the most ancient one in the first branch of this tree (Fig. 5). Obviously, this is not the case, as it is one of the most recent ones to evolve. This suggests that there is less evolutionary pressure on maintaining its primary sequence in the fruit fly than there is in the other insect species. The affinity of neuropeptide-GPCR interactions are typically much smaller when the neuropeptide is only released inside the nervous system. From experiments where SIFamide or the neurons it produces were eliminated, it is clear that the peptide continues to play an important role in this species (Terhzaz et al., 2007), but in *Drosophila*, and likely all flies, SIFamide has no endocrine role and only retains a function within the central nervous system. The loss of an endocrine function could thus be the reason why there is less pressure on maintaining the structure of its receptor. Hence the phylogenetic tree of the SIFamide receptors also points to the possibility that these peptides could have endocrine functions in holometabolous insects.

The effects of SIFamide on the salivary gland have not yet been studied, but as the SN2s are active during feeding one may assume that it stimulates the production of saliva. In adult cockroaches increased feeding will generally lead to increased production of eggs and sperm. So the activation of the SIFamide receptors in the gonads and the fat body while the insect feeds may prime the reproductive organs as well as the fat body for the nutrients that are about to arrive.

It are the pioneer neurons that produce SIFamide (Gellerer et al., 2015). It is perhaps not unreasonable to expect that the first neurons that are needed in a developing embryo are those that make sure the animal will be able to feed. The coincidence that the same peptide might stimulate salivation in both blood feeding ticks and cockroaches and is also expressed in pioneer neurons, is therefore intriguing. Natural selection favors survival of species, for a species to survive its individual members need to survive first. Once individuals are well fed and able to produce viable gametes they should reproduce. If SIFamide and SMYamide were peptides that regulate feeding in a broad sense, as seems plausible (Martelli et al., 2017; Dreyer et al., 2019), it is perhaps not surprising that once they are no longer released (or eliminated by genetic manipulation) insects increase their sexual behavior. This might help explain why elimination of SIFamide in *Drosophila* leads to hypersexual behavior.

## References

- Arendt A, Neupert S, Schendzielorz J, Predel R, Stengl M, 2016. The neuropeptide SIFamide in the  
375 brain of three cockroach species. *J Comp Neurol.* 524:1337-1360. doi: 10.1002/cne.23910.
- Ayub M, Hermiz M, Lange AB, Orchard I, 2020. SIFamide influences feeding in the Chagas disease  
vector, *Rhodnius prolixus*. *Front Neurosci.* 14:134. doi: 10.3389/fnins.2020.00134.
- 380 Baumann O, Kühnel D, Dames P, Walz B, 2004. Dopaminergic and serotonergic innervation of  
cockroach salivary glands: distribution and morphology of synapses and release sites. *J Exp Biol.*  
207:2565-75. doi: 10.1242/jeb.01069.
- Bläser M, Predel R, 2020. Evolution of neuropeptide precursors in Polyneoptera (Insecta). *Front*  
385 *Endocrinol (Lausanne).* 11:197. doi: 10.3389/fendo.2020.00197.
- Davis NT, 1987. Neurosecretory neurons and their projections to the serotonin neurohemal system of  
the cockroach *Periplaneta americana* (L.), and identification of mandibular and maxillary motor  
neurons associated with this system. *J Comp Neurol.* 259:604-621. doi: 10.1002/cne.902590409.  
390
- Dreyer AP, Martin MM, Fulgham CV, Jabr DA, Bai L, Beshel J, Cavanaugh DJ., 2019. A circadian  
output center controlling feeding:fasting rhythms in *Drosophila*. *PLoS Genet.* 15:e1008478. doi:  
10.1371/journal.pgen.1008478.
- 395 Gellerer A, Franke A, Neupert S, Predel R, Zhou X, Liu S, Reiher W, Wegener C, Homberg U, 2015.  
Identification and distribution of SIFamide in the nervous system of the desert locust *Schistocerca*  
*gregaria*. *J Comp Neurol.* 523:108-25. doi: 10.1002/cne.23671.
- Janssen I, Schoofs L, Spittaels K, Neven H, Vanden Broeck J, Devreese B, Van Beeumen J,  
400 Shabanowitz J, Hunt DF, De Loof A, 1996. Isolation of NEB-LFamide, a novel myotropic  
neuropeptide from the grey fleshfly. *Mol Cell Endocrinol.* 117:157-65. doi: 10.1016/0303-  
7207(95)03746-2.

- Jørgensen LM, Hauser F, Cazzamali G, Williamson M, Grimmelikhuijzen CJP, 2006. Molecular  
405 identification of the first SIFamide receptor. *Biochem Biophys Res Commun.* 340:696-701. doi:  
10.1016/j.bbrc.2005.12.062.
- Just F, Walz B, 1996. The effects of serotonin and dopamine on salivary secretion by isolated  
cockroach salivary glands. *J Exp Biol.* 199:407-413.
- 410
- Kim YJ, Zitnan D, Galizia CG, Cho KH, Adams ME, 2006. A command chemical triggers an innate  
behavior by sequential activation of multiple peptidergic ensembles. *Curr. Biol.* 16: 1395–1407. doi:  
10.1016/j.cub.2006.06.027.
- 415 Li S, Zhu S, Jia Q, Yuan D, Ren C, Li K, Liu S, Cui Y, Zhao H, Cao Y, Fang G, Li D, Zhao X, Zhang J,  
Yue Q, Fan Y, Yu X, Feng Q, Zhan S, 2018. The genomic and functional landscapes of developmental  
plasticity in the American cockroach. *Nat Commun.* 9:1008. doi: 10.1038/s41467-018-03281-1.
- Lismont E, Mortelmans N, Verlinden H, Vanden Broeck J, 2018. Molecular cloning and  
420 characterization of the SIFamide precursor and receptor in a hymenopteran insect, *Bombus terrestris*.  
*Gen Comp Endocrinol.* 258:39-52. doi: 10.1016/j.ygcen.2017.10.014.
- Martelli C, Pech U, Kobbenbring S, Pauls D, Bahl B, Sommer MV, Pooryasin A, Barth J, Arias CWP,  
Vassiliou C, Luna AJF, Poppinga H, Richter FG, Wegener C, Fiala A, Riemensperger T, 2017.  
425 SIFamide translates hunger signals into appetitive and feeding behavior in *Drosophila*. *Cell Rep.*  
20:464-478. doi: 10.1016/j.celrep.2017.06.043.
- Maxwell, DJ, 1978. Fine structure of axons associated with the salivary apparatus of the cockroach,  
*Nauphoeta cinerea*. *Tissue Cell* 10:699-706. doi: 10.1016/0040-8166(78)90056-3.
- 430
- Park S, Sonn JY, Oh Y, Lim C, Choe J, 2014. SIFamide and SIFamide receptor defines a novel  
neuropeptide signaling to promote sleep in *Drosophila*. *Mol Cells.* 37:295-301. doi:  
10.14348/molcells.2014.2371.

- 435 Price MN, Dehal PS, Arkin AP, 2010. FastTree 2—approximately maximum-likelihood trees for large alignments. PLoS ONE. 2010;5:e9490. doi: 10.1371/journal.pone.0009490.
- Roller L, Yamanaka N, Watanabe K, Daubnerová I, Zitnan D, Kataoka H, Tanaka Y, 2008. The unique evolution of neuropeptide genes in the silkworm *Bombyx mori*. Insect Biochem Mol Biol. 38:1147-  
440 1157. doi: 10.1016/j.ibmb.2008.04.009.
- Rotte C, Witte J, Blenau W, Baumann O, Walz B, 2009. Source, topography and excitatory effects of GABAergic innervation in cockroach salivary glands. J Exp Biol. 212:126-36. doi: 10.1242/jeb.020412.
- 445 Schachtner J, Bräunig P, 1995. Activity pattern of suboesophageal ganglion cells innervating the salivary glands of the locust *Locusta migratoria*. J Comp Physiol A. 176:491-501. doi: 10.1007/BF00196415.
- 450 Sellami A, Veenstra JA, 2015. SIFamide acts on fruitless neurons to modulate sexual behavior in *Drosophila melanogaster*. Peptides. 74:50-56. doi: 10.1016/j.peptides.2015.10.003.
- Sievers F, Wilm A, Dineen D, Gibson TJ, Karplus K, Li W, Lopez R, McWilliam H, Remmert M, Söding J, Thompson JD, Higgins DG, 2011. Fast, scalable generation of high-quality protein multiple  
455 sequence alignments using Clustal Omega. Mol Syst Biol. 7:539. doi: 10.1038/msb.2011.75.
- Šimo L, Koči J, Park Y, 2013. Receptors for the neuropeptides, myoinhibitory peptide and SIFamide, in control of the salivary glands of the blacklegged tick *Ixodes scapularis*. Insect Biochem Mol Biol. 43:376-87. doi: 10.1016/j.ibmb.2013.01.002.
- 460 Šimo L, Zitnan D, Park Y, 2009. Two novel neuropeptides in innervation of the salivary glands of the black-legged tick, *Ixodes scapularis*: myoinhibitory peptide and SIFamide. J Comp Neurol. 517:551-563. doi: 10.1002/cne.22182.



- 465 Sonenshine DE, Bissinger BW, Egekwu N, Donohue KV, Khalil SM, Roe RM, 2011. First transcriptome of the testis-vas deferens-male accessory gland and proteome of the spermatophore from *Dermacentor variabilis* (Acari: Ixodidae). PLoS One. 2011;6(9):e24711. Doi: 10.1371/journal.pone.0024711.
- 470 Tanaka Y, Suetsugu Y, Yamamoto K, Noda H, Shinoda T, 2014. Transcriptome analysis of neuropeptides and G-protein coupled receptors (GPCRs) for neuropeptides in the brown planthopper *Nilaparvata lugens*. Peptides 53:125-33. doi: 10.1016/j.peptides.2013.07.027.
- Terhzaz S, Rosay P, Goodwin SF, Veenstra JA, 2007. The neuropeptide SIFamide modulates sexual  
475 behavior in *Drosophila*. Biochem Biophys Res Commun. 352:305-310. doi: 10.1016/j.bbrc.2006.11.030.
- Vázquez-Acevedo N, Rivera NM, Torres-González AM, Rullan-Matheu Y, Ruíz-Rodríguez EA, Sosa  
480 MA, 2009. GYRKPPFNGSIFamide (Gly-SIFamide) modulates aggression in the freshwater prawn *Macrobrachium rosenbergii*. Biol Bull. 217:313-326. doi: 10.1086/BBLv217n3p313.
- Veenstra JA, 2014. The contribution of the genomes of a termite and a locust to our understanding of insect neuropeptides and neurohormones. Front Physiol. 5:454. doi: 10.3389/fphys.2014.00454.
- 485 Veenstra JA, 2020. Arthropod IGF, relaxin and gonadulin, putative orthologs of *Drosophila* insulin-like peptides 6, 7 and 8, likely originated from an ancient gene triplication. PeerJ. 8:e9534. doi: 10.7717/peerj.9534.
- Watanabe H, Mizunami M., 2006. Classical conditioning of activities of salivary neurones in the  
490 cockroach. J Exp Biol. 209:766-779. doi: 10.1242/jeb.02049.

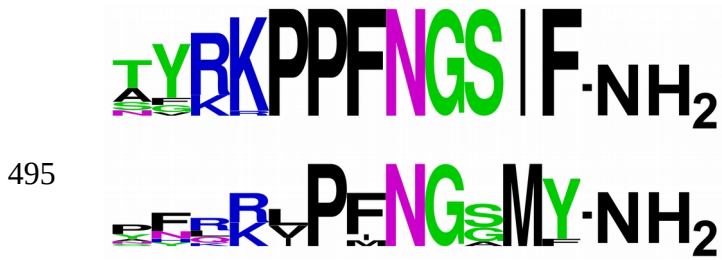

Fig. 1. Sequence logos of SIFamide and SMYamide. Note that the SIFamide peptide sequences are better conserved than the SMYamide sequences.

500

505

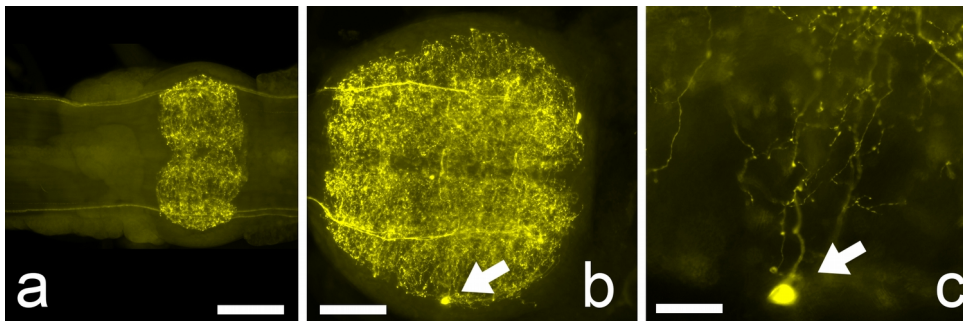

510

Fig. 2. SIFamide immunoreactivity in the fourth abdominal (a) and terminal abdominal ganglia (b) of a male cockroach. On occasion one can find small SIFamide immunoreactive neurons like the one in the terminal ganglion (arrow in b) at a higher magnification it is possible to follow their axons for a short distance (arrow in c). Scale bars 200  $\mu$ m (a and b) and 50  $\mu$ m (c).

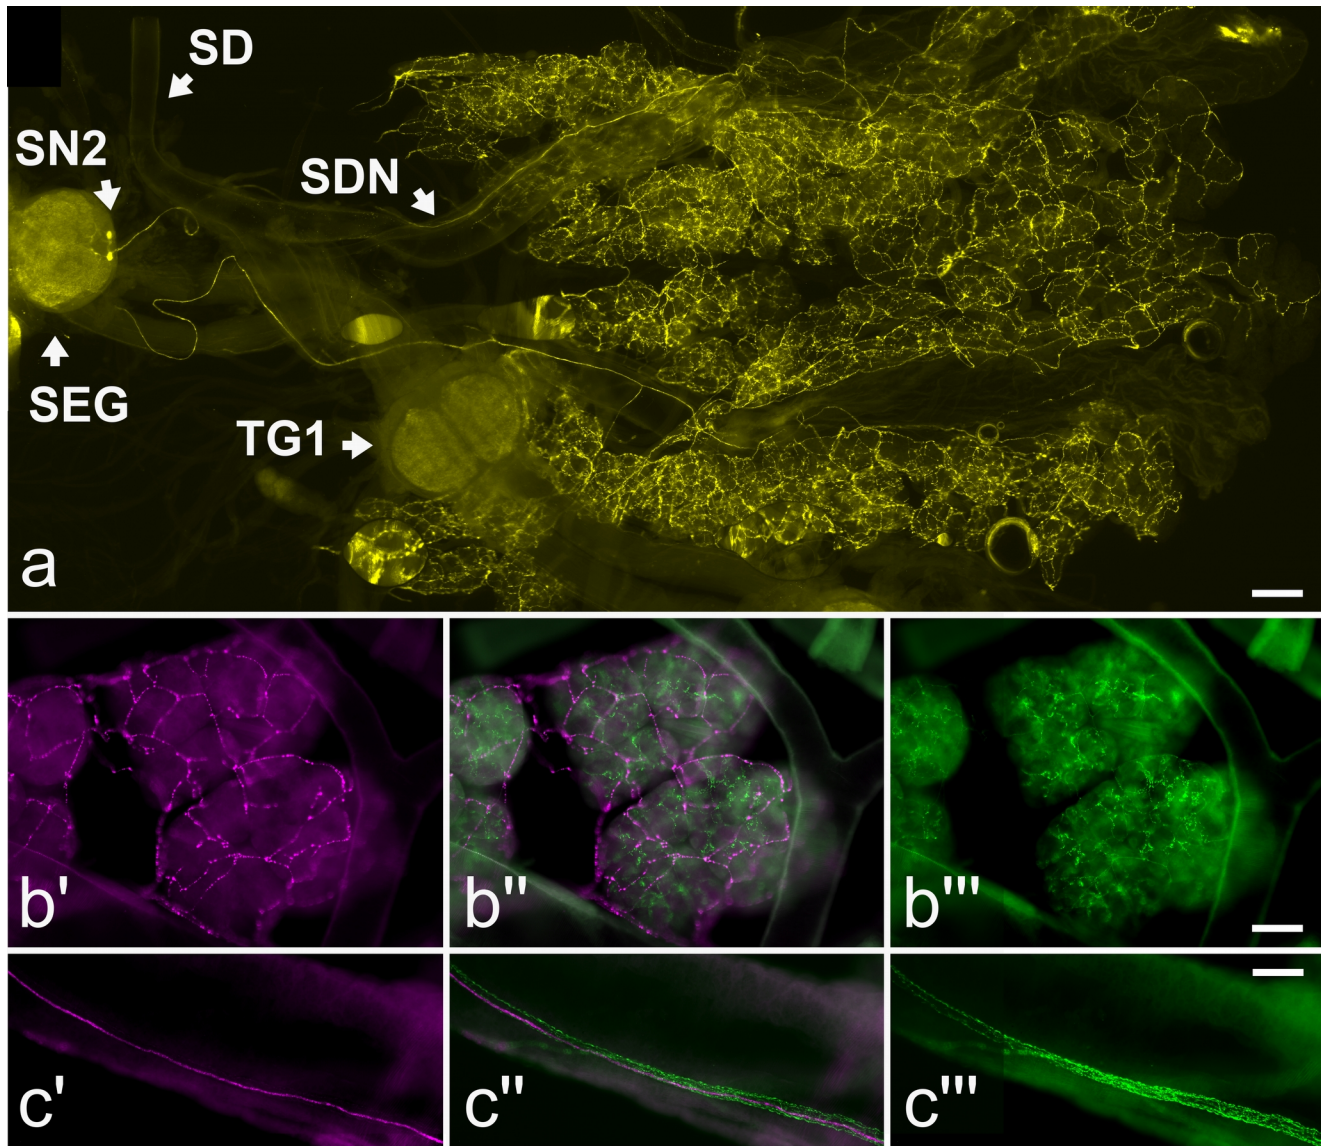

515 Fig. 3. SIFamide immunoreactive neurons innervating the salivary gland. In (a) an overview of part of  
the ventral nerve cord with the subesophageal ganglion (SEG) and the first thoracic ganglion (TG1),  
the salivary gland (the structure that occupies the right half of the picture) and the salivary duct (SD) as  
well as the salivary duct nerve (SDN) through which the axons of the two salivary neurons 2 (SN2) run  
to the salivary gland. Note the extensive branching of the two SN2 neurons inside the salivary gland. In  
520 (b) SIFamide immunoreactive innervation in individual acini is revealed by magenta (b' and b''), while  
5HT-immunoreactive axons are in green (b'' and b'''). Note that the innervation by SIFamide appears  
very superficial, while the 5HT-immunoreactive axons penetrate between the individual cells of the  
acini. In (c) the single SIFamide axon in the SDN shown in magenta (c' and c'') is accompanied by a  
number of smaller 5HT-immunoreactive axons in green (c'' and c'''). Scale bars 400  $\mu\text{m}$  (a) and 100  
525  $\mu\text{m}$  (b and c).

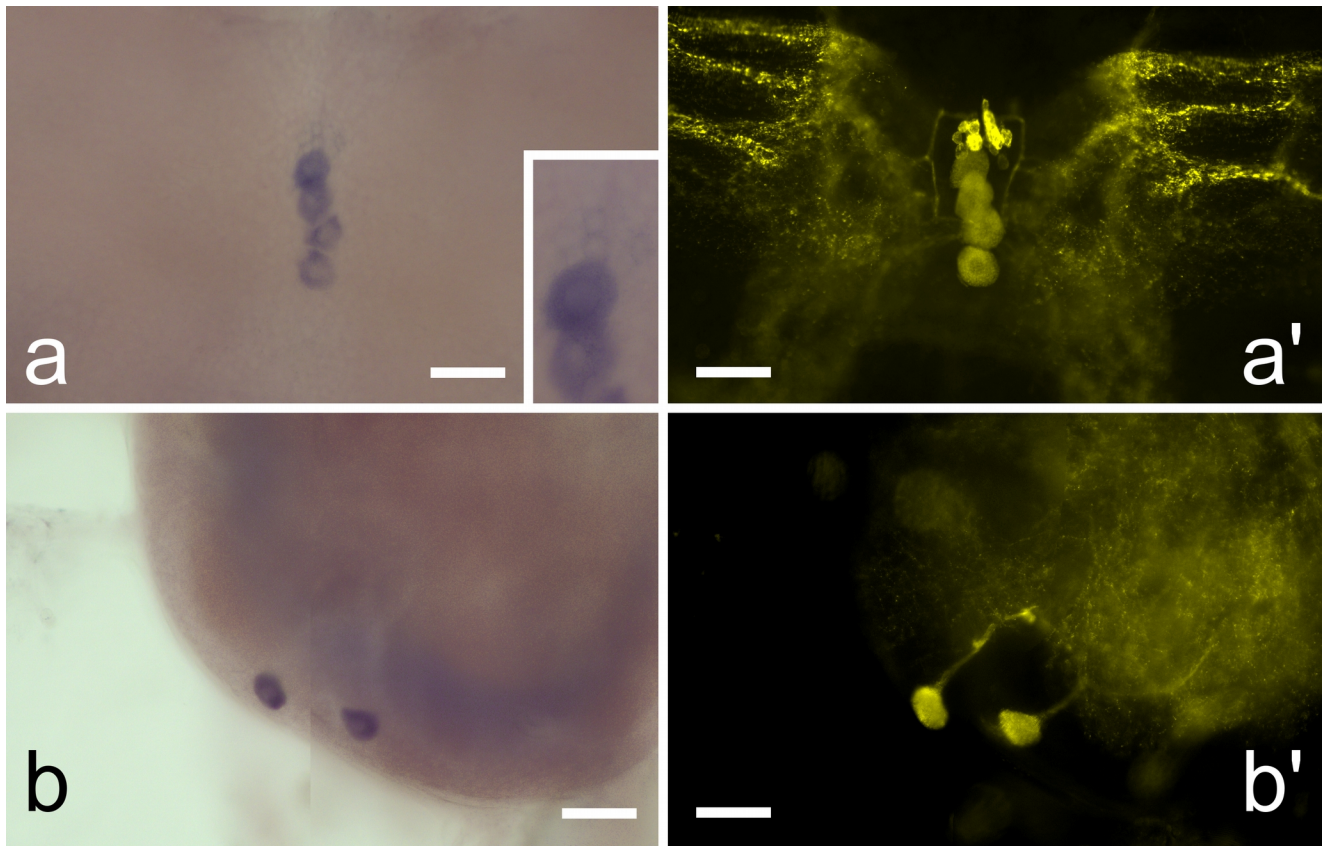

Fig. 4. *In situ* hybridization. In (a) SIFamide *in situ* hybridization localizes to the four big SIFamide immunoreactive interneurons of the brain identified by immunofluorescence in (a'). The much smaller SIFamide immunoreactive neurons on top of the larger ones are also recognized by the SIFamide anti-sense probe, although very weakly (insert in a'). In (b) SMYamide *in situ* hybridization signal (b) localizes to the SN2 neurons of the subesophageal ganglion as shown by simultaneous labeling of these neurons with SIFamide antiserum (b'). All scale bars 100  $\mu$ m.

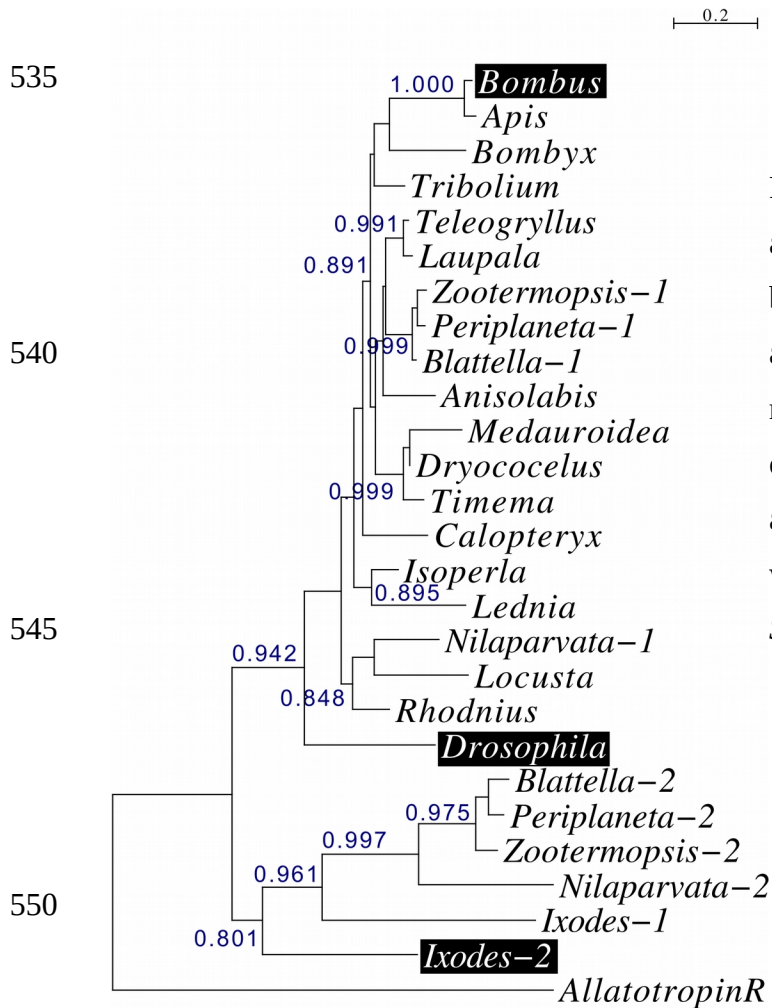

Fig. 5. Phylogenetic tree of deorphanized arthropod SIFamide receptors, highlighted in black, and their orthologs from a number of additional species. Note that the tree reveals two major branches, each of which contains at least one deorphanized receptor. Branch probabilities of at least 0.80 have been indicated on the tree that was rooted on the allatotropin receptor from *Schistocerca gregaria*.

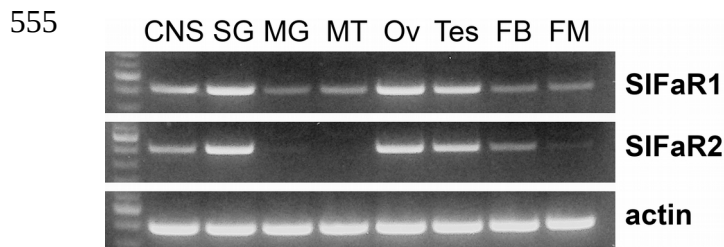

Fig. 6. RT-PCR of the two *Periplaneta* SIFamide receptor-related GPCRs and actin in various tissues. First lane in each gel contains a 100 bp DNA ladder; the more intense band corresponds to 500 bp. CNS, central nervous system; SG, salivary gland; MG, midgut; MT, Malpighian tubules; Ov, ovary; Tes, testes; FB, fatbody; FM, flight muscle. Note the significant expression in the CNS, salivary glands and the gonads and minor expression in other tissues.
